# Supplementary material
Source: Springer Nature journal article supplement (https://www.springermedizin.de/resource/supplementary/12967_2012_1508_MOESM1_ESM.pdf/9574232)
Supplement: MOESM1 [file 9574232]

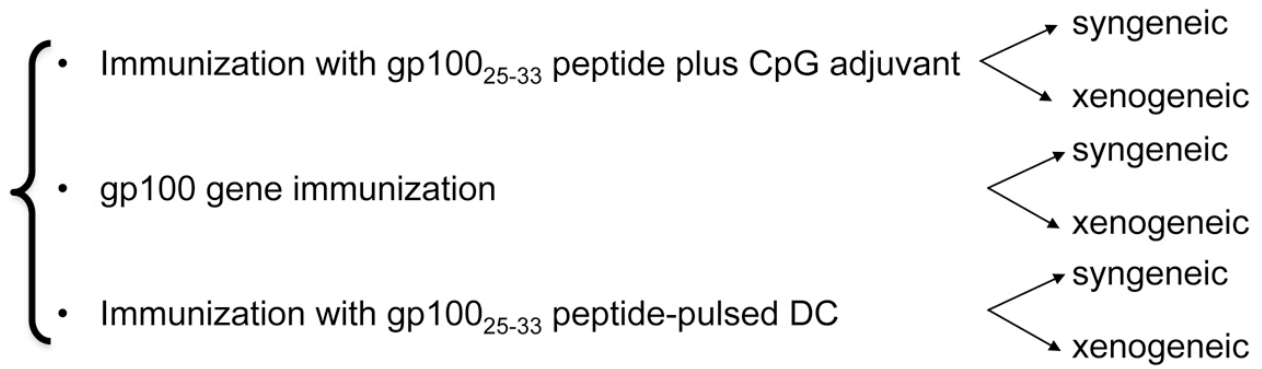

Supplementary Figure 1. Summary of immunization protocols.

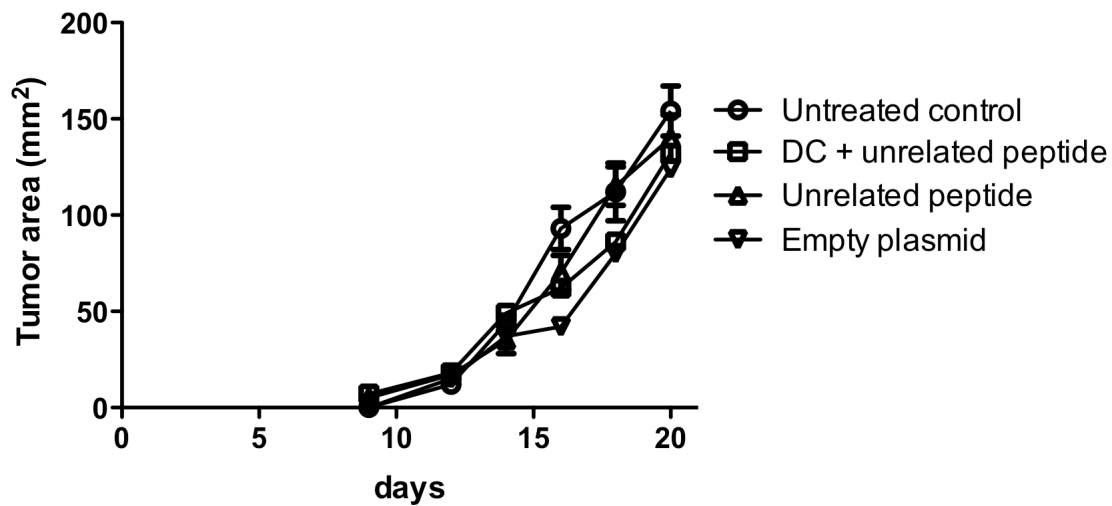

Supplementary Figure 2. Comparative analysis of the different control protocols for gp100 vaccination. Data, expressed as mean  $\pm$  SD, refer to one of two separate experiments performed treating 4 mice per group. Identical results were obtained in the other experiment.
